# Supplementary material for: Long-Term and Seasonal Dynamics of Dengue in Iquitos, Peru
Source: PubMed Central journal article supplement (PMC4102451; doi:10.1371/journal.pntd.0003003), 2014-07-17
Supplement: pntd.0003003.s008.pdf [file pntd.0003003.s008.pdf]

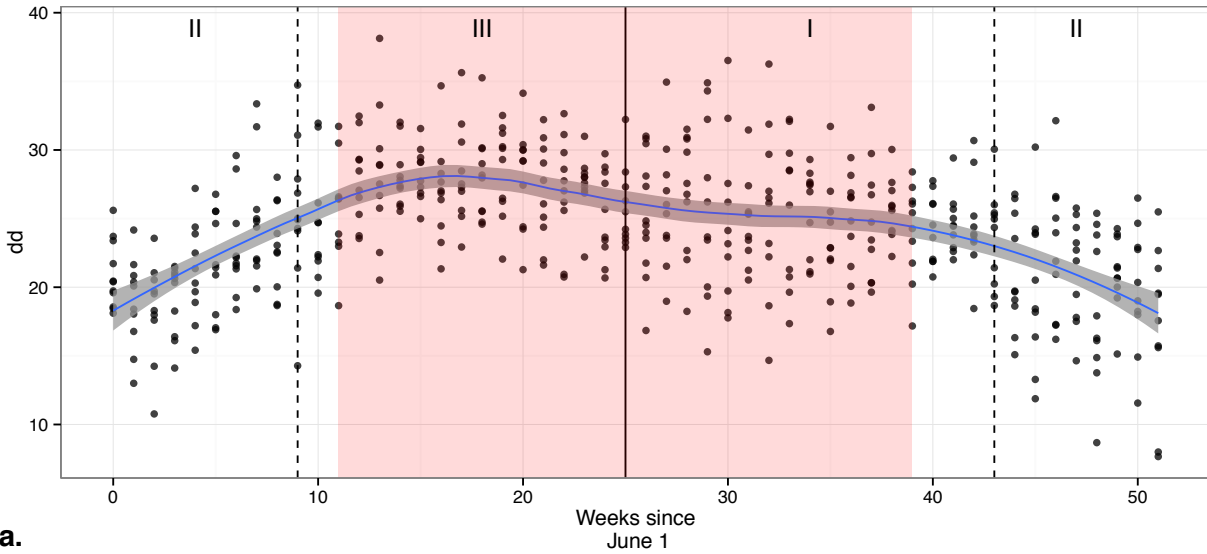

a.

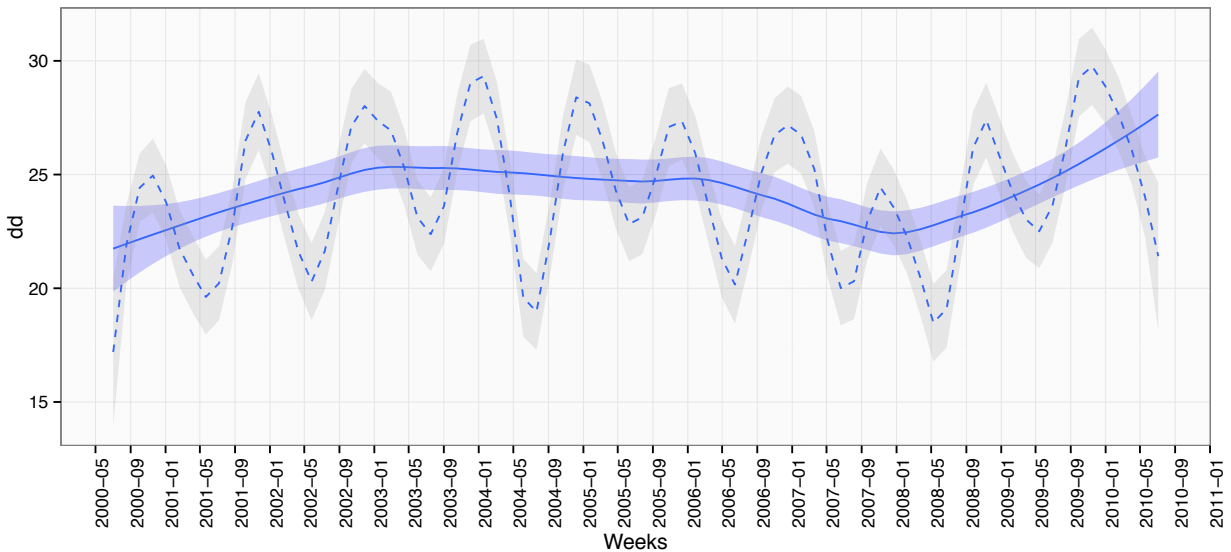

b.

**Figure S8:** Seasonal (a) and long-term (b) trends of  $DD_{24}$  in Iquitos, Peru. In (a), annual trimesters (demarcated by dashed vertical lines) and the dengue season (red shaded area) are indicated. The blue line is the loess smoothed response with standard error,  $\alpha = 0.5$ . In (b), solid line is the loess smoothed response with standard error ( $\alpha = 0.5$ , blue envelope). The dashed line is for  $\alpha = 0.1$  with standard error (grey envelope, See Methods).
