# Supplementary material for: Long-Term and Seasonal Dynamics of Dengue in Iquitos, Peru
Source: PubMed Central journal article supplement (PMC4102451; doi:10.1371/journal.pntd.0003003), 2014-07-17
Supplement: pntd.0003003.s015.pdf [file pntd.0003003.s015.pdf]

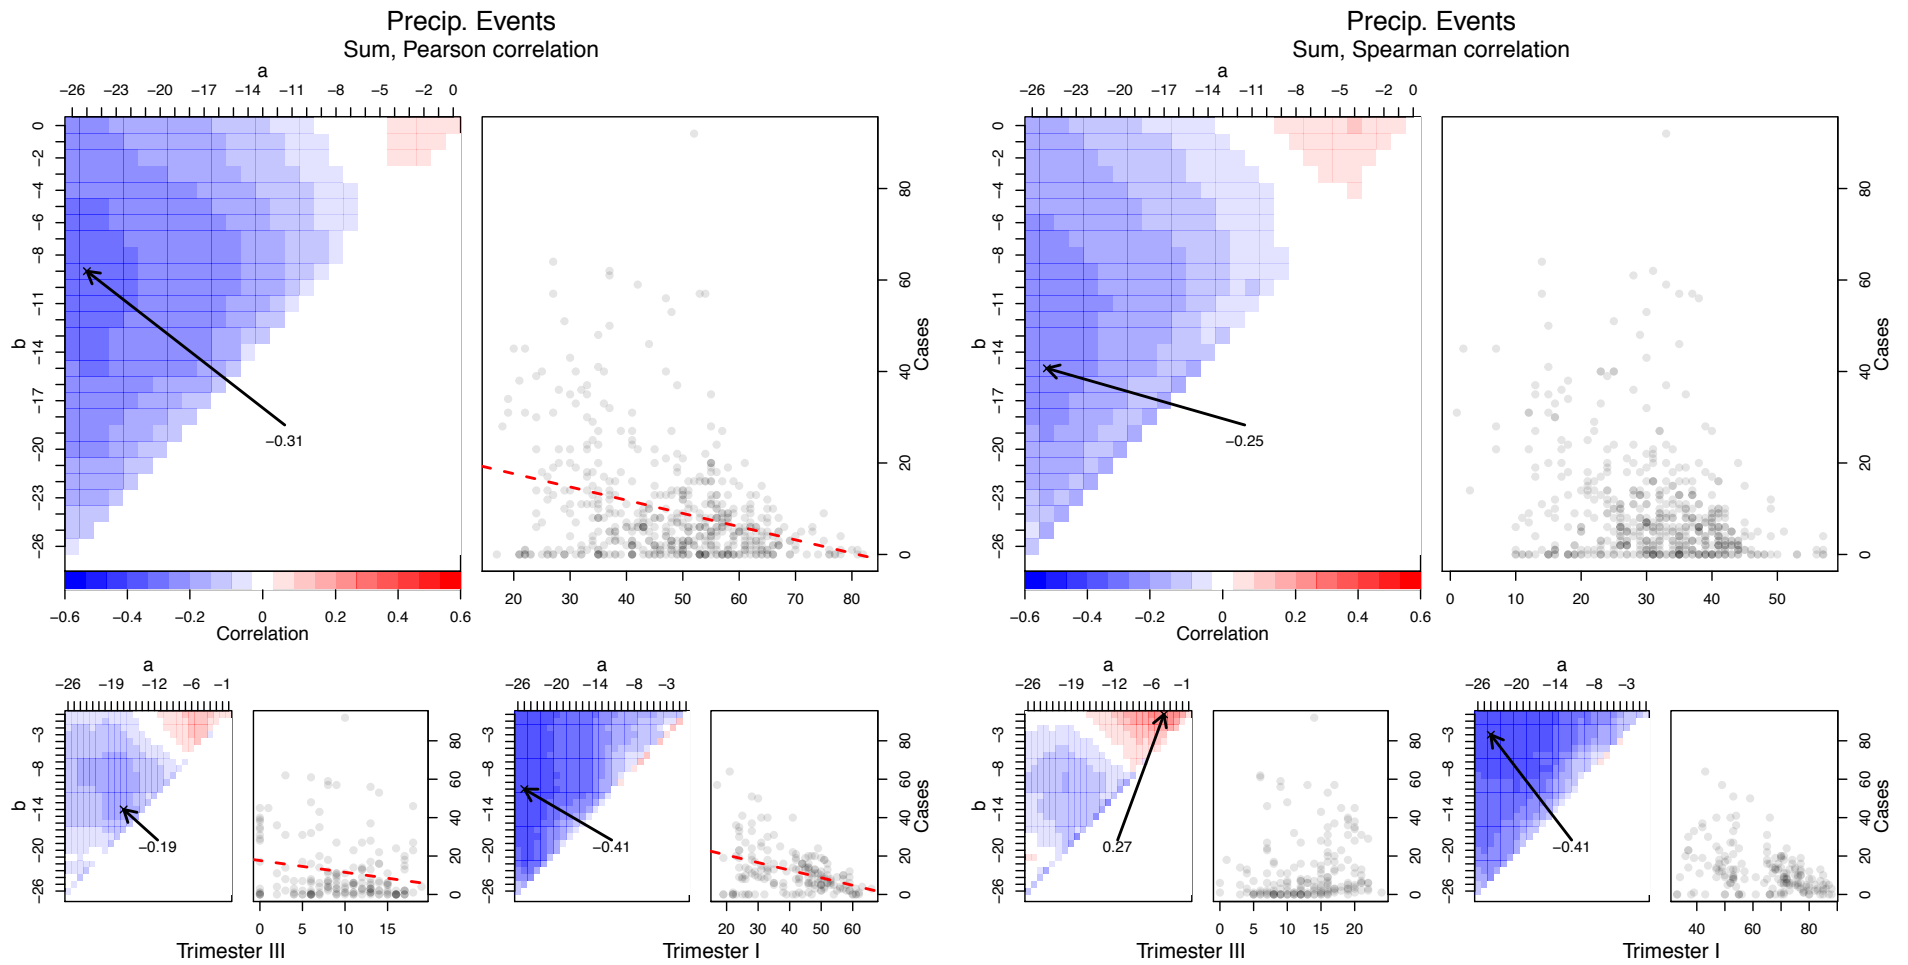

**Figure S15:** CCM and scatterplot at lag of highest  $|r|$  in Spearman and Pearson correlations for the whole year (large panels) and trimesters I and III.
