# Supplementary material for: Long-Term and Seasonal Dynamics of Dengue in Iquitos, Peru
Source: PubMed Central journal article supplement (PMC4102451; doi:10.1371/journal.pntd.0003003), 2014-07-17
Supplement: pntd.0003003.s018.pdf [file pntd.0003003.s018.pdf]

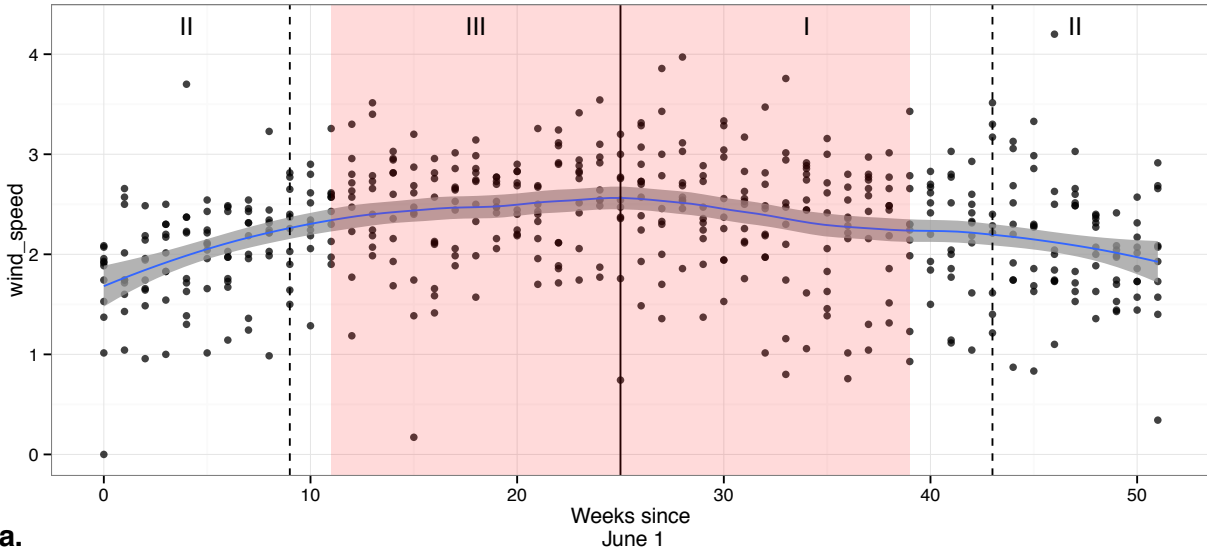

a.

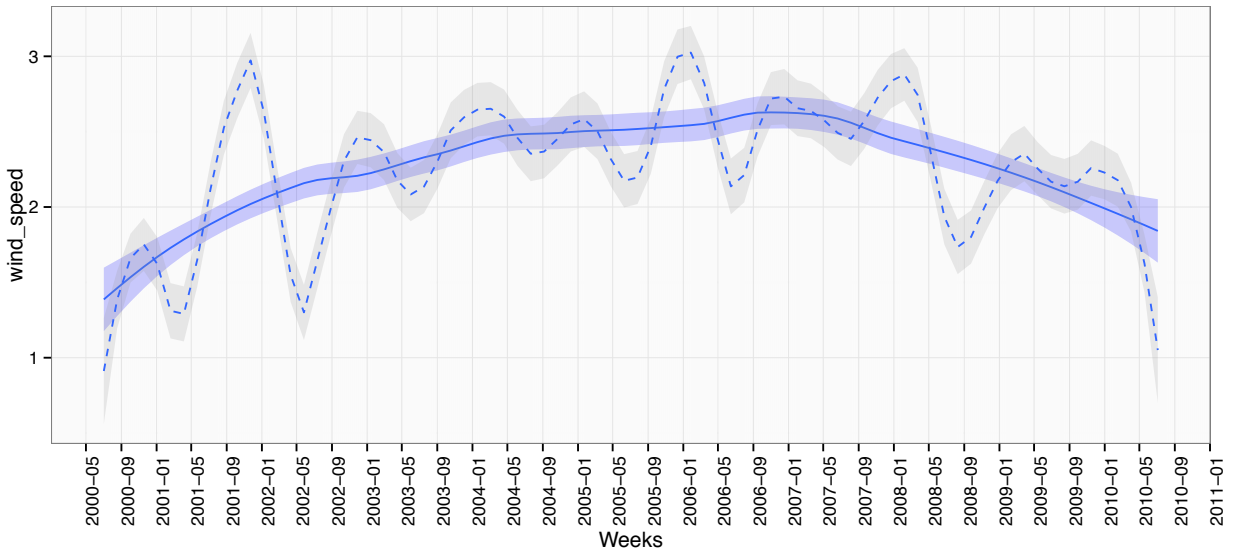

b.

**Figure S18:** Seasonal (a) and long-term (b) trends of wind speed in Iquitos, Peru. In (a), annual trimesters (demarcated by dashed vertical lines) and the dengue season (red shaded area) are indicated. The blue line is the loess smoothed response with standard error,  $\alpha = 0.5$ . In (b), solid line is the loess smoothed response with standard error ( $\alpha = 0.5$ , blue envelope). The dashed line is for  $\alpha = 0.1$  with standard error (grey envelope, See Methods).
